# Supplementary material for: Genomic Characterization of the Periwinkle Leaf Yellowing (PLY) Phytoplasmas in Taiwan
Source: Front Microbiol. 2019 Sep 19;10:2194. doi: 10.3389/fmicb.2019.02194 (PMC6761752; doi:10.3389/fmicb.2019.02194)
Supplement: TABLE S1 — Polymorphic sites between the two phytoplasma strains characterized in this study. [file Table_1.XLSX]

## Sheet: structural_variations
Contig ID	Position	Description	Feature	Locus_tag	PMU-region
II	28890	no read crossed the junction	CDS	PLY_1070	+
III	56048	no read crossed the junction	intergenic		-
V	8293-9705	no read mapped	CDS	PLY_3980-3990	-
V	15048	no read crossed the junction	CDS	PLY_4100	+
V	91421-99507	no read mapped	CDS	PLY_4860-4940	+
VI	0-14404	no read mapped	CDS	PLY_4950-5090	+
VI	17868-18884	no read mapped	CDS	PLY_5110	+
VI	21232-26331	no read mapped	CDS	PLY_5180-5260	+
VII	17644	no read crossed the junction	intergenic		-
VII	45524	no read crossed the junction	CDS	PLY_5690	+

## Sheet: sequence_variations
Contig_ID	Position	DY2014	SS2016	Type	Feature	Synonymous?	Locus_tag	Gene	Description
I	4824	T	C	SNP	CDS	non-synonymous	PLY_0080	NA	hypothetical protein
I	5186	T	G	SNP	CDS	non-synonymous	PLY_0080	NA	hypothetical protein
I	11323	A	C	SNP	CDS	synonymous	PLY_0130	mgs	1,2-diacylglycerol 3-alpha-glucosyltransferase
I	14663	T	A	SNP	CDS	non-synonymous	PLY_0170	rplI	50S ribosomal protein L9
I	18425	T	A	SNP	intergenic
I	19609	T	C	SNP	CDS	non-synonymous	PLY_0210	holA	DNA polymerase III subunit delta
I	20531	A	G	SNP	CDS	non-synonymous	PLY_0220	engB	ribosome biogenesis GTP-binding protein
I	20881	ATTTTTT	ATTTTTTT	insertion	intergenic
I	27515	G	T	SNP	intergenic
I	31822	T	G	SNP	pseudo		PLY_0350	argE	acetylornithine deacetylase
I	37832	A	C	SNP	CDS	non-synonymous	PLY_0440	hsp20	HSP20 family protein
I	38392	G	A	SNP	intergenic
I	46386	G	T	SNP	intergenic
I	47062	T	C	SNP	intergenic
I	47974	G	A	SNP	CDS	synonymous	PLY_0560	NA	hypothetical protein
I	52657	C	T	SNP	intergenic
I	52902	A	G	SNP	CDS	non-synonymous	PLY_0630	rpoD	DNA-directed RNA polymerase sigma-70 factor
I	53841	C	A	SNP	intergenic
I	59632	A	G	SNP	CDS	non-synonymous	PLY_0710	smc	chromosome segregation ATPase
I	60720	C	T	SNP	CDS	non-synonymous	PLY_0720	NA	putative secreted protein
I	60769	G	A	SNP	CDS	non-synonymous	PLY_0720	NA	putative secreted protein
I	62110	G	A	SNP	intergenic
I	62537	T	G(24%)	SNP	intergenic
I	63064	A	G(36%)	SNP	intergenic
I	63193	T	G	SNP	intergenic
I	63194	C	G	SNP	intergenic
I	63438	G	A	SNP	intergenic
II	2786	A	G	SNP	CDS	non-synonymous	PLY_0770	nrdA	ribonucleotide-diphosphate reductase subunit alpha
II	10781	T	C	SNP	intergenic
II	15823	T	C	SNP	pseudo		PLY_0880	hflB	ATP-dependent Zn protease
II	16025	G	A	SNP	pseudo		PLY_0880	hflB	ATP-dependent Zn protease
II	19529	G	A	SNP	CDS	synonymous	PLY_0980	dam	site-specific DNA methylase
II	19791	C	T	SNP	CDS	non-synonymous	PLY_0980	dam	site-specific DNA methylase
II	23991	ATGGTAATAAAGTGGTAATAAAGTGGTAATAAGATGGTAATAAAACGGTAATAAAGTGGTAATAAAGTGGTAATAAA	ATGGTAATAAAGTGGTAATAAGATGGTAATAAAACGGTAATAAAGTGGTAATAAAGTGGTAATAAA	deletion	intergenic
II	24905	T	C	SNP	CDS	non-synonymous	PLY_1030	dnaG	DNA primase
II	28733	G	A	SNP	CDS	synonymous	PLY_1070	tmk	thymidylate kinase
II	30389	T	C	SNP	CDS	non-synonymous	PLY_1110	NA	putative secreted protein, AYWB SAP11-like protein
II	35679	A	G	SNP	pseudo		PLY_1160	hflB	ATP-dependent Zn protease
II	41454	T	G	SNP	CDS	non-synonymous	PLY_1270	NA	putative secreted protein
II	44358	G	A	SNP	CDS	non-synonymous	PLY_1310	smc	chromosome segregation ATPase
II	44878	A	G	SNP	CDS	non-synonymous	PLY_1310	smc	chromosome segregation ATPase
II	48292	T	C	SNP	CDS	non-synonymous	PLY_1350	hflB	ATP-dependent Zn protease
II	51076	C	A	SNP	pseudo		PLY_1400	rpoD	DNA-directed RNA polymerase sigma-70 factor
II	54224	C	T	SNP	CDS	synonymous	PLY_1480	himA	DNA-binding protein HU
II	58215	A	C	SNP	intergenic
II	58403	A	G	SNP	intergenic
II	61527	A	G(28%)	SNP	intergenic
II	64269	A	G	SNP	CDS	synonymous	PLY_1620	NA	hypothetical protein
II	64353	C	T	SNP	intergenic
II	64892	TAAAAAA	TAAAAAAA	insertion	intergenic
II	65433	G	A	SNP	CDS	non-synonymous	PLY_1640	tra5	Tra5 transposase
II	66307	G	T	SNP	intergenic
II	66483	A	G	SNP	CDS	synonymous	PLY_1650	NA	hypothetical protein
II	70603	C	T	SNP	CDS	non-synonymous	PLY_1710	NA	hypothetical protein
II	71517	CTTTTT	CTTTTTT	insertion	CDS		PLY_1740	NA	hypothetical protein
II	75686	T	G(41%)	SNP	intergenic
II	76302	A	G(57%)	SNP	CDS	non-synonymous	PLY_1800	NA	hypothetical protein
II	76719	T	G(63%)	SNP	CDS	synonymous	PLY_1810	NA	hypothetical protein
II	77187	T	G(40%)	SNP	CDS	non-synonymous	PLY_1820	NA	hypothetical protein
II	77190	T	C(31%)	SNP	CDS	non-synonymous	PLY_1820	NA	hypothetical protein
II	77280	G	C(34%)	SNP	CDS	non-synonymous	PLY_1820	NA	hypothetical protein
II	77571	T	G	SNP	CDS	non-synonymous	PLY_1820	NA	hypothetical protein
II	77859	A	G(37%)	SNP	CDS	non-synonymous	PLY_1820	NA	hypothetical protein
II	77876	A	T(29%)	SNP	CDS	non-synonymous	PLY_1820	NA	hypothetical protein
II	77928	A	C(15%)	SNP	CDS	non-synonymous	PLY_1820	NA	hypothetical protein
II	78035	G	A	SNP	intergenic
III	449	A	C(31%)	SNP	intergenic
III	496	G	A(64%)	SNP	intergenic
III	512	A	G(40%)	SNP	intergenic
III	540	C	A(21%)	SNP	intergenic
III	583	C	T(44%)	SNP	intergenic
III	1949	A	G	SNP	pseudo		PLY_1840	hflB	ATP-dependent Zn protease
III	2630	A	G	SNP	CDS	non-synonymous	PLY_1860	NA	putative secreted protein
III	5280	T	C	SNP	CDS	synonymous	PLY_1930	rpoD	DNA-directed RNA polymerase sigma-70 factor
III	22185	T	G	SNP	CDS	non-synonymous	PLY_2140	NA	hypothetical protein
III	22681	C	G	SNP	CDS	synonymous	PLY_2160	NA	hypothetical protein
III	28814	G	T	SNP	intergenic
III	28944	A	G	SNP	CDS	non-synonymous	PLY_2210	NA	hypothetical protein
III	33683	C	T	SNP	CDS	non-synonymous	PLY_2260	NA	hypothetical protein
III	35128	G	A	SNP	CDS	synonymous	PLY_2280	polA	DNA polymerase I
III	35557	T	C	SNP	CDS	synonymous	PLY_2280	polA	DNA polymerase I
III	35596	G	A	SNP	CDS	synonymous	PLY_2280	polA	DNA polymerase I
III	35800	G	T	SNP	CDS	synonymous	PLY_2280	polA	DNA polymerase I
III	36637	A	C	SNP	CDS	synonymous	PLY_2280	polA	DNA polymerase I
III	43138	C	T	SNP	CDS	non-synonymous	PLY_2330	NA	putative secreted protein
III	45703	T	C	SNP	pseudo		PLY_2390	dam	site-specific DNA methylase
III	51333	C	T	SNP	intergenic
III	53156	C	T(29%)	SNP	pseudo		PLY_2480	uvrD	ATP-dependent DNA helicase
III	53231	A	T(26%)	SNP	pseudo		PLY_2480	uvrD	ATP-dependent DNA helicase
III	55031	C	T	SNP	intergenic
III	57685	G	A	SNP	CDS	synonymous	PLY_2550	potD	ABC-type spermidine/putrescine transport system substrate-binding protein
III	58997	G	A	SNP	CDS	non-synonymous	PLY_2560	potC	ABC-type spermidine/putrescine transport system permease protein
III	62320	G	T	SNP	CDS	non-synonymous	PLY_2590	hflB	ATP-dependent Zn protease
III	63818	A	G	SNP	intergenic
III	65857	C	T	SNP	CDS	non-synonymous	PLY_2610	NA	hypothetical protein
III	69984	ATTTTTT	ATTTTT	deletion	intergenic
III	71811	CAAAAAA	CAAAAAAA	insertion	intergenic
III	73407	T	G	SNP	CDS	synonymous	PLY_2660	rnjA	ribonuclease J
III	82845	G	T	SNP	CDS	non-synonymous	PLY_2730	glyS	glycyl-tRNA synthetase
III	83133	T	G	SNP	CDS	synonymous	PLY_2740	era	GTPase
III	85475	C	T	SNP	CDS	non-synonymous	PLY_2770	NA	endonuclease
III	86320	C	T	SNP	CDS	non-synonymous	PLY_2790	uvrD	ATP-dependent DNA helicase
III	87336	T	C	SNP	CDS	non-synonymous	PLY_2790	uvrD	ATP-dependent DNA helicase
III	90695	T	C	SNP	intergenic
III	91536	G	T	SNP	pseudo		PLY_2810	uvrD	ATP-dependent DNA helicase
III	91979	C	T(19%)	SNP	pseudo		PLY_2810	uvrD	ATP-dependent DNA helicase
III	92054	A	T(19%)	SNP	pseudo		PLY_2810	uvrD	ATP-dependent DNA helicase
III	95145	G	A	SNP	pseudo		PLY_2850	hsdM	type I restriction-modification system subunit M
III	102079	ACCCCCCC	ACCCCCCCC	insertion	intergenic
III	102216	T	C	SNP	CDS	synonymous	PLY_2950	rpoE	DNA-directed RNA polymerase subunit delta
III	113240	T	C	SNP	CDS	non-synonymous	PLY_3080	pdhD	dihydrolipoamide dehydrogenase
III	114193	C	G	SNP	CDS	non-synonymous	PLY_3090	pdhC	pyruvate dehydrogenase E2 component (dihydrolipoamide acetyltransferase)
III	121296	C	T	SNP	CDS	synonymous	PLY_3130	pheT	phenylalanyl-tRNA synthetase subunit beta
III	124913	T	G	SNP	pseudo		PLY_3160	asnB	asparagine synthase
III	127408	G	A	SNP	CDS	synonymous	PLY_3220	dnaE	DNA polymerase III subunit alpha
III	134466	G	T	SNP	CDS	non-synonymous	PLY_3270	tra5	Tra5 transposase
III	135818	AGGGGGGG	AGGGGGGGGG	insertion	intergenic
III	138590	T	A	SNP	pseudo		PLY_3300	dnaB	replicative DNA helicase
III	139136	G	A	SNP	pseudo		PLY_3300	dnaB	replicative DNA helicase
III	140093	T	G	SNP	pseudo		PLY_3330	dnaB	replicative DNA helicase
III	140101	C	A	SNP	pseudo		PLY_3330	dnaB	replicative DNA helicase
III	141555	T	C	SNP	CDS	non-synonymous	PLY_3340	dnaG	DNA primase
III	142542	A	G	SNP	intergenic
III	143321	CAAAAAAA	CAAAAAAAA	insertion	pseudo		PLY_3360	tra5	Tra5 transposase
III	143419	A	C	SNP	pseudo		PLY_3360	tra5	Tra5 transposase
III	154144	G	T	SNP	CDS	synonymous	PLY_3490	dacA	diadenylate cyclase
III	154367	ATTTTT	ATTTT	deletion	intergenic
III	154372	TG	T	deletion	intergenic
III	155058	T	C	SNP	CDS	non-synonymous	PLY_3500	mgtA	cation transport ATPase, P-type
III	155221	A	G	SNP	CDS	synonymous	PLY_3500	mgtA	cation transport ATPase, P-type
III	157396	C	A	SNP	intergenic
III	160114	G	A	SNP	CDS	non-synonymous	PLY_3530	artM	ABC-type amino acid transport system permease protein
III	163878	A	G	SNP	intergenic
III	165493	ATTTTTTTT	ATTTTTTTTT	insertion	intergenic
III	166041	C	T(50%)	SNP	intergenic
III	166057	A	G	SNP	intergenic
III	166058	T	G	SNP	intergenic
III	166335	T	C(67%)	SNP	intergenic
IV	1387	G	A	SNP	intergenic
IV	4746	A	C	SNP	CDS	non-synonymous	PLY_3670	rad50	DNA double-strand break repair Rad50 ATPase
IV	7597	C	G	SNP	CDS	non-synonymous	PLY_3710	NA	putative secreted protein, AYWB SAP68-like protein
IV	7892	A	C	SNP	intergenic
IV	8172	A	G	SNP	CDS	non-synonymous	PLY_3720	NA	putative secreted protein, AYWB SAP67-like protein
IV	9313	C	T	SNP	intergenic
IV	11602	G	A	SNP	CDS	non-synonymous	PLY_3780	NA	endonuclease
IV	14451	T	C(64%)	SNP	CDS	synonymous	PLY_3860	NA	hypothetical protein
IV	14920	A	G(19%)	SNP	CDS	non-synonymous	PLY_3870	NA	hypothetical protein
V	1496	C	T(24%)	SNP	CDS	non-synonymous	PLY_3880	uvrD	ATP-dependent DNA helicase
V	2388	T	G	SNP	CDS	non-synonymous	PLY_3880	uvrD	ATP-dependent DNA helicase
V	5194	G	A	SNP	CDS	non-synonymous	PLY_3920	NA	endonuclease
V	5488	G	A	SNP	CDS	non-synonymous	PLY_3920	NA	endonuclease
V	16772	G	A	SNP	CDS	synonymous	PLY_4110	hflB	ATP-dependent Zn protease
V	17135	G	A	SNP	CDS	synonymous	PLY_4110	hflB	ATP-dependent Zn protease
V	21409	G	T	SNP	CDS	non-synonymous	PLY_4140	NA	hypothetical protein
V	27896	T	G	SNP	intergenic
V	30999	A	G	SNP	CDS	synonymous	PLY_4280	hflB	ATP-dependent Zn protease
V	32115	C	T	SNP	CDS	synonymous	PLY_4280	hflB	ATP-dependent Zn protease
V	33033	A	G	SNP	CDS	synonymous	PLY_4280	hflB	ATP-dependent Zn protease
V	33195	G	T	SNP	CDS	synonymous	PLY_4280	hflB	ATP-dependent Zn protease
V	33311	G	T	SNP	intergenic
V	34918	G	C	SNP	CDS	non-synonymous	PLY_4320	ssb	single-stranded DNA-binding protein
V	36168	G	A	SNP	intergenic
V	36813	T	C	SNP	CDS	synonymous	PLY_4340	NA	putative secreted protein
V	37191	T	C	SNP	intergenic
V	55699	T	G	SNP	CDS	non-synonymous	PLY_4480	artM	ABC-type amino acid transport system permease protein
V	57005	ATTTTTTTTTT	ATTTTTTTTT	deletion	intergenic
V	59106	C	T	SNP	CDS	non-synonymous	PLY_4520	NA	putative secreted protein, AYWB SAP61-like protein
V	60121	ATTTT	ATTTTT	insertion	intergenic
V	63303	G	A	SNP	CDS	non-synonymous	PLY_4560	NA	putative secreted protein
V	64478	T	G	SNP	CDS	non-synonymous	PLY_4580	NA	hypothetical protein
V	66242	G	A	SNP	pseudo		PLY_4600	hflB	ATP-dependent Zn protease
V	68466	A	C	SNP	CDS	non-synonymous	PLY_4630	NA	hypothetical protein
V	68998	G	T	SNP	intergenic
V	70669	T	C	SNP	CDS	synonymous	PLY_4660	NA	hypothetical protein
V	70982	G	T	SNP	intergenic
V	72182	AAAATAATTATAAATTGAAATAATTATAAATTGAAATAATTATAAATTGAAATAATTATAAATTGAAATAATTAT	AAAATAATTATAAATTGAAATAATTATAAATTGAAATAATTATAAATTGAAATAATTAT	deletion	intergenic
V	76151	G	A	SNP	CDS	non-synonymous	PLY_4690	prfB	protein chain release factor B
V	78379	CTTTTTT	CTTTTTTT	insertion	intergenic
V	83981	G	T	SNP	CDS	non-synonymous	PLY_4770	polC	DNA polymerase III subunit alpha, Gram-positive type
V	84623	C	T	SNP	CDS	non-synonymous	PLY_4770	polC	DNA polymerase III subunit alpha, Gram-positive type
V	89493	G	A	SNP	CDS	non-synonymous	PLY_4800	NA	hypothetical protein
V	90614	A	T	SNP	intergenic
V	90807	ATATAGTATTTTTTATAGTATTTTTTATAGTATTTTTT	ATATAGTATTTTTTATAGTATTTTTTATAGTATTTTTTATAGTATTTTTT	insertion	CDS		PLY_4850	NA	hypothetical protein
VI	14412	A	T	SNP	intergenic
VI	14983	A	G(44%)	SNP	CDS	synonymous	PLY_5100	uvrD	ATP-dependent DNA helicase
VI	15279	T	C(30%)	SNP	CDS	non-synonymous	PLY_5100	uvrD	ATP-dependent DNA helicase
VI	15469	C	T(64%)	SNP	CDS	synonymous	PLY_5100	uvrD	ATP-dependent DNA helicase
VI	15499	C	T(31%)	SNP	CDS	synonymous	PLY_5100	uvrD	ATP-dependent DNA helicase
VI	15667	C	T	SNP	CDS	synonymous	PLY_5100	uvrD	ATP-dependent DNA helicase
VI	15741	C	T(30%)	SNP	CDS	non-synonymous	PLY_5100	uvrD	ATP-dependent DNA helicase
VI	15943	C	G(53%)	SNP	CDS	non-synonymous	PLY_5100	uvrD	ATP-dependent DNA helicase
VI	15946	T	A(53%)	SNP	CDS	non-synonymous	PLY_5100	uvrD	ATP-dependent DNA helicase
VI	15964	A	T(42%)	SNP	CDS	non-synonymous	PLY_5100	uvrD	ATP-dependent DNA helicase
VI	15982	A	C(46%)	SNP	CDS	non-synonymous	PLY_5100	uvrD	ATP-dependent DNA helicase
VI	16683	A	C(39%)	SNP	CDS	non-synonymous	PLY_5100	uvrD	ATP-dependent DNA helicase
VI	16712	G	T(30%)	SNP	CDS	non-synonymous	PLY_5100	uvrD	ATP-dependent DNA helicase
VI	17215	C	T(84%)	SNP	CDS	synonymous	PLY_5100	uvrD	ATP-dependent DNA helicase
VI	17430	T	G	SNP	CDS	synonymous	PLY_5100	uvrD	ATP-dependent DNA helicase
VI	19008	A	G(17%)	SNP	CDS	synonymous	PLY_5110	NA	hypothetical protein
VI	19044	A	G(39%)	SNP	CDS	synonymous	PLY_5110	NA	hypothetical protein
VI	19102	A	C(27%)	SNP	CDS	non-synonymous	PLY_5120	NA	hypothetical protein
VI	19103	A	G(29%)	SNP	CDS	non-synonymous	PLY_5120	NA	hypothetical protein
VI	19161	T	A(28%)	SNP	CDS	non-synonymous	PLY_5120	NA	hypothetical protein
VI	19235	G	A	SNP	CDS	non-synonymous	PLY_5120	NA	hypothetical protein
VI	19414	G	A	SNP	CDS	synonymous	PLY_5120	NA	hypothetical protein
VI	19767	G	A	SNP	CDS	non-synonymous	PLY_5130	NA	hypothetical protein
VI	20129	G	A	SNP	CDS	synonymous	PLY_5130	NA	hypothetical protein
VI	20345	C	A(33%)	SNP	CDS	non-synonymous	PLY_5140	NA	hypothetical protein
VI	20681	C	A	SNP	CDS	non-synonymous	PLY_5150	NA	hypothetical protein
VI	20801	TAAAAAAA	TAAAAAAAA(40%)	insertion	intergenic
VI	20846	A	G(54$)	SNP	CDS	synonymous	PLY_5160	NA	hypothetical protein
VI	26798	A	G	SNP	CDS	non-synonymous	PLY_5270	NA	hypothetical protein
VI	27020	T	C	SNP	CDS	non-synonymous	PLY_5270	NA	hypothetical protein
VI	28209	T	C	SNP	intergenic
VI	29452	A	G	SNP	intergenic
VI	29957	C	T	SNP	intergenic
VII	1082	G	A	SNP	pseudo		PLY_5310	artM	ABC-type amino acid transport system permease protein
VII	3298	G	T	SNP	CDS	non-synonymous	PLY_5330	argS	arginyl-tRNA synthetase
VII	7865	A	G	SNP	CDS	synonymous	PLY_5350	srmB	superfamily II DNA/RNA helicase
VII	8807	A	C	SNP	intergenic
VII	13276	TAAAAAAA	TAAAAAAAA	insertion	intergenic
VII	13482	TAAAAAAA	TAAAAAAAA	insertion	intergenic
VII	13523	CAAAAAA	CAAAAA	deletion	intergenic
VII	19088	A	G	SNP	CDS	synonymous	PLY_5430	pmbA	modulator of DNA gyrase
VII	20740	TAAAAA	TAAAAAA	insertion	intergenic
VII	25988	TGGGGGGG	TGGGGGG	deletion	intergenic
VII	26666	T	C	SNP	CDS	non-synonymous	PLY_5510	hcaD	NADH oxidase H2O2-forming
VII	29445	C	T	SNP	CDS	synonymous	PLY_5540	ligA	DNA ligase (NAD(+))
VII	41701	T	C	SNP	CDS	non-synonymous	PLY_5650	dnaB	replicative DNA helicase
VII	42180	A	G	SNP	CDS	non-synonymous	PLY_5650	dnaB	replicative DNA helicase
VII	42438	A	G	SNP	CDS	non-synonymous	PLY_5650	dnaB	replicative DNA helicase
VII	42691	C	T	SNP	CDS	non-synonymous	PLY_5650	dnaB	replicative DNA helicase
VII	44688	ATTTTTTTT	ATTTTTTT	deletion	CDS		PLY_5680	NA	putative secreted protein
VII	45099	A	T	SNP	CDS	non-synonymous	PLY_5680	NA	putative secreted protein
VII	48725	A	G	SNP	intergenic
VII	54555	A	G	SNP	CDS	non-synonymous	PLY_5770	alaS	alanyl-tRNA synthetase
VII	60117	GAAAAAAAAAAAAAAA	GAAAAAAAAAAAAA	deletion	intergenic
VII	67068	GAAAAAAA	GAAAAAA	deletion	intergenic
VII	68994	C	T	SNP	CDS	synonymous	PLY_6000	pyk	pyruvate kinase
VII	74371	T	C	SNP	CDS	synonymous	PLY_6050	pgi	glucose-6-phosphate isomerase
VII	74869	T	C	SNP	CDS	synonymous	PLY_6050	pgi	glucose-6-phosphate isomerase
VII	77637	A	G	SNP	CDS	non-synonymous	PLY_6070	pfkA	6-phosphofructokinase
VII	77873	T	C	SNP	CDS	non-synonymous	PLY_6070	pfkA	6-phosphofructokinase
VII	80740	A	G	SNP	intergenic
VII	81622	A	G	SNP	pseudo		PLY_6090	alaS	alanyl-tRNA synthetase
VII	82070	C	T	SNP	pseudo		PLY_6090	alaS	alanyl-tRNA synthetase
VIII	1420	A	G	SNP	pseudo		PLY_6150	alaS	alanyl-tRNA synthetase
VIII	3104	A	C	SNP	CDS	non-synonymous	PLY_6170	ruvX	Holliday junction resolvase
VIII	7318	T	C(79%)	SNP	intergenic
VIII	9597	G	A	SNP	pseudo		PLY_6300	argE	acetylornithine deacetylase
VIII	15234	A	G	SNP	CDS	non-synonymous	PLY_6350	NA	putative secreted protein, AYWB SAP50-like protein
VIII	19566	C	T	SNP	CDS	non-synonymous	PLY_6400	gpmI	phosphoglycerate mutase
VIII	19750	A	G	SNP	CDS	synonymous	PLY_6400	gpmI	phosphoglycerate mutase
VIII	21771	A	C	SNP	pseudo		PLY_6420	pgi	glucose-6-phosphate isomerase
VIII	22045	G	T	SNP	pseudo		PLY_6420	pgi	glucose-6-phosphate isomerase
VIII	22613	C	T	SNP	pseudo		PLY_6420	pgi	glucose-6-phosphate isomerase
VIII	24197	A	G	SNP	CDS	synonymous	PLY_6460	norM	Na+ driven multidrug efflux pump
VIII	26476	A	C	SNP	intergenic
VIII	27446	C	A	SNP	pseudo		PLY_6480	norM	Na+ driven multidrug efflux pump
VIII	27597	A	G	SNP	pseudo		PLY_6480	norM	Na+ driven multidrug efflux pump
VIII	31264	C	T	SNP	CDS	non-synonymous	PLY_6520	rbgA	ribosome biogenesis GTP-binding protein
VIII	33156	C	T	SNP	CDS	non-synonymous	PLY_6550	miaA	tRNA delta(2)-isopentenylpyrophosphate transferase
VIII	48328	T	C	SNP	CDS	synonymous	PLY_6670	rpsL	30S ribosomal protein S12
VIII	51666	C	G	SNP	CDS	synonymous	PLY_6680	rpoC	DNA-directed RNA polymerase subunit beta'
VIII	58978	T	C	SNP	intergenic
VIII	59939	C	A	SNP	CDS	non-synonymous	PLY_6750	secE	preprotein translocase subunit SecE
VIII	72940	C	A	SNP	CDS	non-synonymous	PLY_6820	yidC	preprotein translocase subunit
VIII	94525	C	T	SNP	CDS	synonymous	PLY_7070	rpsK	30S ribosomal protein S11
VIII	106457	C	T	SNP	CDS	synonymous	PLY_7320	rplD	50S ribosomal protein L4
VIII	106731	C	A	SNP	CDS	synonymous	PLY_7330	rplC	50S ribosomal protein L3
VIII	110131	C	T	SNP	intergenic
VIII	110571	ATT	ATTT	insertion	CDS		PLY_7380	NA	putative secreted protein
VIII	116461	C	A	SNP	CDS	non-synonymous	PLY_7420	dppF	ABC-type peptide/nickel transport system ATP-binding protein
VIII	116690	A	C	SNP	CDS	synonymous	PLY_7430	dppD	ABC-type peptide/nickel transport system ATP-binding protein
VIII	120171	A	G	SNP	CDS	non-synonymous	PLY_7460	dppA	ABC-type peptide/nickel transport system substrate-binding protein
VIII	124923	G	T	SNP	CDS	non-synonymous	PLY_7500	mgtA	cation transport ATPase, P-type
VIII	129664	G	T	SNP	CDS	non-synonymous	PLY_7520	ileS	isoleucyl-tRNA synthetase
VIII	129774	G	A	SNP	CDS	non-synonymous	PLY_7520	ileS	isoleucyl-tRNA synthetase
VIII	132186	A	G	SNP	intergenic
VIII	140228	G	A	SNP	CDS	synonymous	PLY_7600	NA	hypothetical protein
VIII	141111	A	C	SNP	CDS	non-synonymous	PLY_7620	NA	hypothetical protein
VIII	145408	T	C	SNP	CDS	non-synonymous	PLY_7660	fbaA	fructose-bisphosphate aldolase
VIII	145904	T	G	SNP	CDS	synonymous	PLY_7660	fbaA	fructose-bisphosphate aldolase
VIII	148109	T	G	SNP	intergenic
VIII	151512	CAAAAAAA	CAAAAAA	deletion	intergenic
VIII	161243	A	C	SNP	CDS	non-synonymous	PLY_7810	NA	putative secreted protein, AYWB SAP34-like protein
VIII	164405	A	G	SNP	pseudo		PLY_7850	hflB	ATP-dependent Zn protease
VIII	169419	C	T	SNP	CDS	non-synonymous	PLY_7890	pth	peptidyl-tRNA hydrolase
VIII	172127	T	C	SNP	CDS	synonymous	PLY_7910	infB	translation initiation factor IF-2
VIII	182270	G	T	SNP	CDS	non-synonymous	PLY_8000	cysS	cysteinyl-tRNA synthetase
VIII	184421	T	C	SNP	CDS	synonymous	PLY_8010	gltX	glutamyl-tRNA synthetase
VIII	184877	C	T	SNP	CDS	synonymous	PLY_8020	rpsI	30S ribosomal protein S9
VIII	189100	ATTTTTTT	ATTTTTTTT	insertion	intergenic
VIII	193798	C	T	SNP	CDS	synonymous	PLY_8120	tilS	tRNA(Ile)-lysidine synthase
VIII	197921	T	C	SNP	intergenic
VIII	200233	T	C	SNP	CDS	non-synonymous	PLY_8150	spoT	bifunctional (p)ppGpp synthetase/guanosine-3',5'-bis(diphosphate) 3'-pyrophosphohydrolase
VIII	204551	C	A	SNP	CDS	non-synonymous	PLY_8180	amp	antigenic membrane protein
VIII	204773	TAAAAAAAA	TAAAAAAAAA	insertion	intergenic
VIII	206159	T	G	SNP	CDS	synonymous	PLY_8190	groEL	molecular chaperonin large subunit
VIII	206500	TAAAAAA	TAAAAAAA	insertion	intergenic
VIII	208254	A	C	SNP	intergenic
VIII	209944	T	A(17%)	SNP	pseudo		PLY_8220	uvrD	ATP-dependent DNA helicase
VIII	210019	G	A(35%)	SNP	pseudo		PLY_8220	uvrD	ATP-dependent DNA helicase
VIII	210054	G	A(35%)	SNP	pseudo		PLY_8220	uvrD	ATP-dependent DNA helicase
VIII	210265	C	T(45%)	SNP	pseudo		PLY_8220	uvrD	ATP-dependent DNA helicase
VIII	210333	A	C(35%)	SNP	pseudo		PLY_8220	uvrD	ATP-dependent DNA helicase
VIII	210343	G	A(64%)	SNP	pseudo		PLY_8220	uvrD	ATP-dependent DNA helicase
VIII	210463	T	C(19%)	SNP	pseudo		PLY_8220	uvrD	ATP-dependent DNA helicase
VIII	210601	A	G	SNP	pseudo		PLY_8220	uvrD	ATP-dependent DNA helicase
VIII	212146	T	C	SNP	CDS	non-synonymous	PLY_8280	NA	hypothetical protein
VIII	212663	A	C	SNP	CDS	non-synonymous	PLY_8290	NA	hypothetical protein
VIII	221279	A	T	SNP	CDS	non-synonymous	PLY_8410	NA	putative secreted protein
VIII	225648	T	C	SNP	CDS	synonymous	PLY_8470	cbf	CMP-binding factor
VIII	227477	C	A	SNP	pseudo		PLY_8490	nlpA	metal ABC transporter substrate-binding protein
VIII	230920	ATTATTTAAG	ATTATTTAAGAATAAAAAAGTTTATTTTTTTTTATTTAAG	insertion	CDS		PLY_8530	NA	hypothetical protein
VIII	233083	G	C	SNP	CDS	synonymous	PLY_8540	znuB	ABC-type Mn/Zn transport system permease protein
VIII	234075	C	A	SNP	CDS	non-synonymous	PLY_8550	znuB	ABC-type Mn/Zn transport system permease protein
VIII	236261	T	C	SNP	CDS	non-synonymous	PLY_8570	znuA	ABC-type Mn/Zn transport system periplasmic Mn/Zn-binding protein
VIII	238200	A	G	SNP	CDS	synonymous	PLY_8580	NA	hypothetical protein
VIII	238478	C	T	SNP	CDS	non-synonymous	PLY_8580	NA	hypothetical protein
VIII	240365	AGGGGGGGG	AGGGGGGG	deletion	CDS		PLY_8610	NA	hypothetical protein
VIII	251857	T	G	SNP	CDS	non-synonymous	PLY_8750	NA	hypothetical protein
VIII	251989	G	A	SNP	CDS	non-synonymous	PLY_8750	NA	hypothetical protein
VIII	252723	T	C	SNP	CDS	synonymous	PLY_8770	NA	hypothetical protein
VIII	253887	ATAATTGTATTAATTCCTTAATTGTATTAATTCCTTAATTGTATTAATTCCTTAATTGTATTAATTCCTTAATTGTATTAATTCCT	ATAATTGTATTAATTCCTTAATTGTATTAATTCCTTAATTGTATTAATTCCTTAATTGTATTAATTCCT	deletion	intergenic
VIII	255213	A	C	SNP	intergenic
VIII	256115	T	C	SNP	CDS	synonymous	PLY_8790	NA	putative secreted protein
VIII	260888	C	A	SNP	CDS	non-synonymous	PLY_8840	spoVG	septation protein spoVG
VIII	261091	C	A	SNP	intergenic
VIII	263215	ATTTTT	ATTT	deletion	intergenic
VIII	266004	G	A	SNP	intergenic
VIII	269712	T	G	SNP	CDS	synonymous	PLY_8910	acpP	acyl carrier protein
VIII	271290	A	G	SNP	CDS	non-synonymous	PLY_8930	NA	hypothetical protein
VIII	277864	G	T	SNP	CDS	synonymous	PLY_8990	trmE	tRNA modification GTPase
VIII	280024	T	C	SNP	CDS	non-synonymous	PLY_9010	malE	ABC-type sugar transport system maltose-binding protein
VIII	280463	T	C	SNP	CDS	synonymous	PLY_9010	malE	ABC-type sugar transport system maltose-binding protein
VIII	284419	A	G	SNP	intergenic
